# Supplementary material for: Lignin monomer conversion into biolubricant base oils
Source: Royal Society of Chemistry journal article supplement (doi:10.1039/d1gc03350f), 2021-01-01
Supplement: d1gc03350f1.pdf [file d1gc03350f1.pdf]

## Supplementary Information

### Lignin Monomer Conversion into Biolubricant Base Oils

Elvis Osamudiamhen Ebikade<sup>1, 2</sup>, Sunitha Sadula<sup>1</sup>, Sibao Liu<sup>1, 3</sup>, and Dionisios G. Vlachos<sup>1, 2\*</sup>

<sup>1</sup>*Catalysis Center for Energy Innovation, University of Delaware, 221 Academy Street, Newark, DE, 19716 USA.*

<sup>2</sup>*Department of Chemical and Biomolecular Engineering, University of Delaware, 150 Academy Street, Newark, DE, 19716 USA.*

<sup>3</sup>*Key Laboratory for Green Chemical Technology of Ministry of Education, School of Chemical Engineering and Technology, Tianjin University, Tianjin 300072, China*

\*Corresponding author: [vlachos@udel.edu](mailto:vlachos@udel.edu)

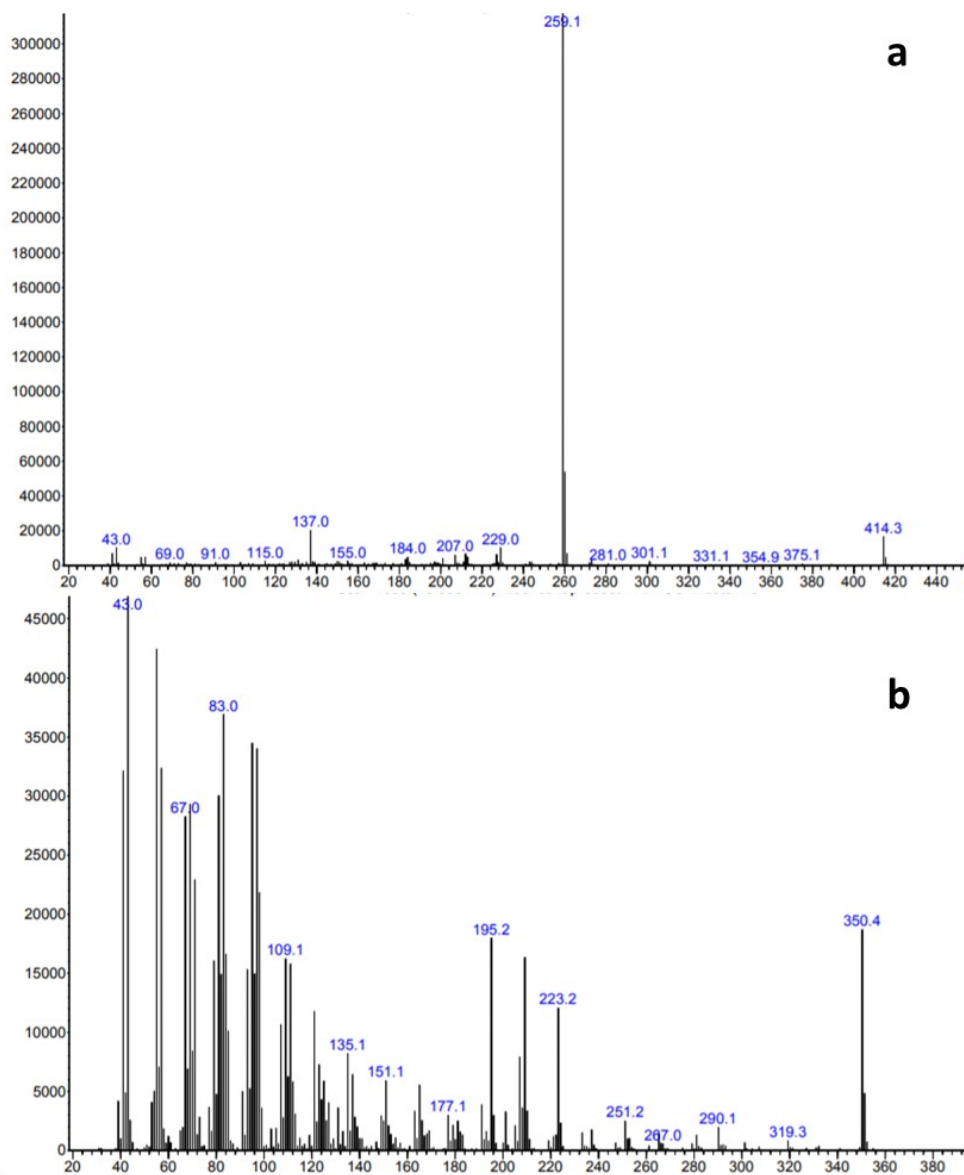

Figure S1: GCMS mass fragmentation of (a) branched benzene lubricant product (mass from GCMS – 414.3, calculated mass – 414) and (b) enal byproduct (mass from GCMS – 350.4, calculated mass – 350).

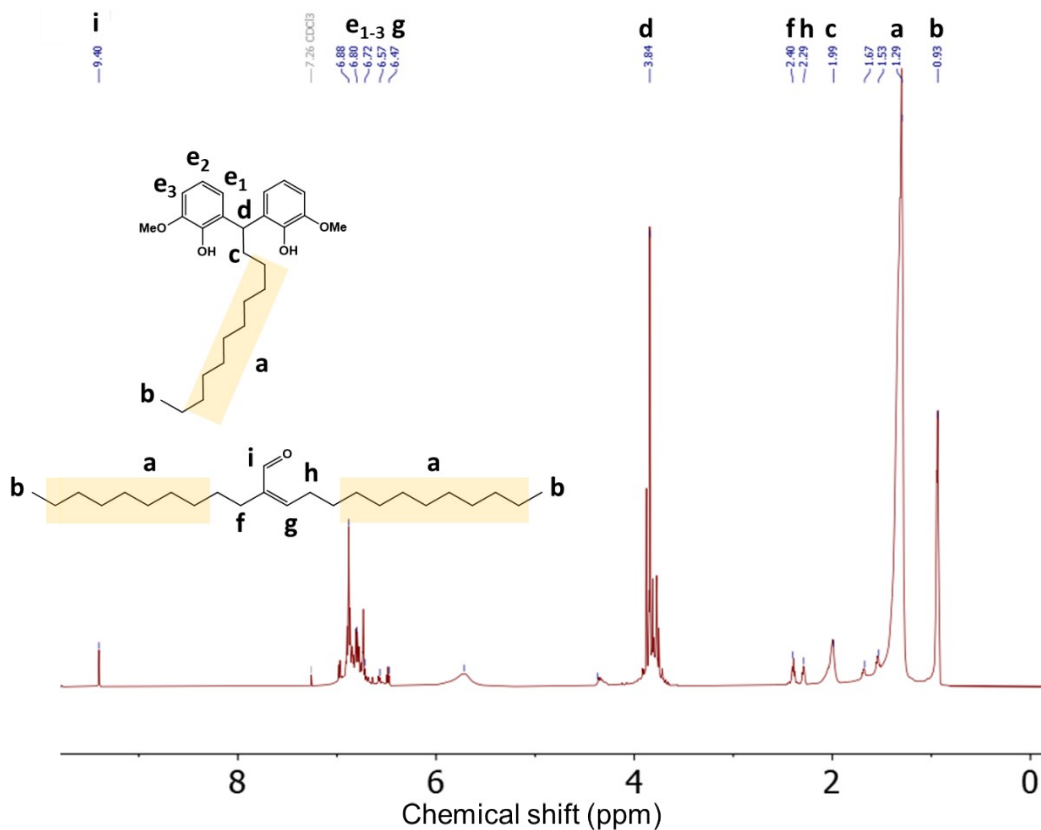

Figure S2:  $^1\text{H}$  NMR spectrum of HAA reaction product. The sample was prepared in  $\text{CDCl}_3$ . The predominant product is the BBL followed by the enal product. The labels a-i are referencing the hydrogen atoms.

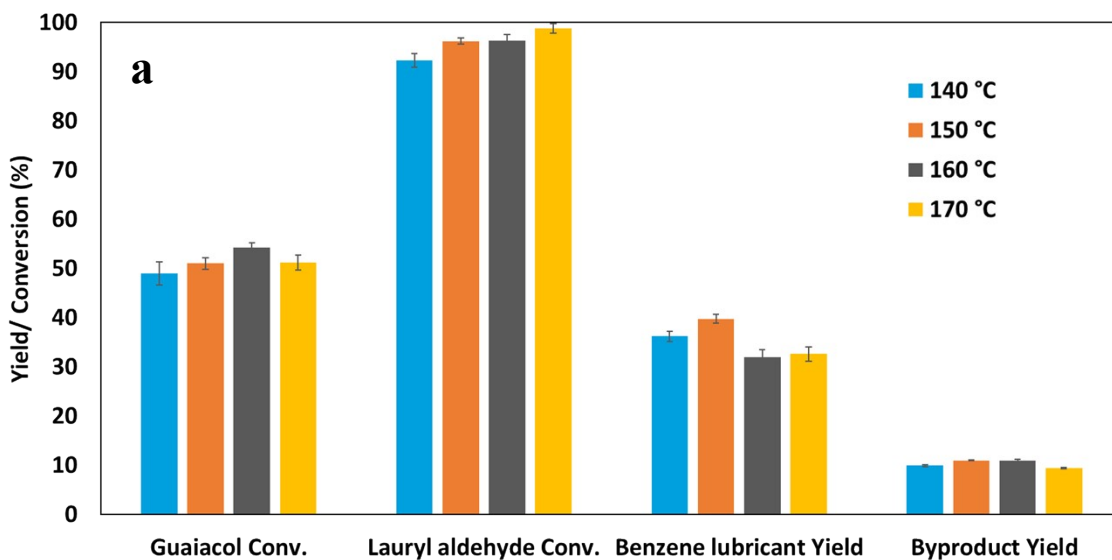

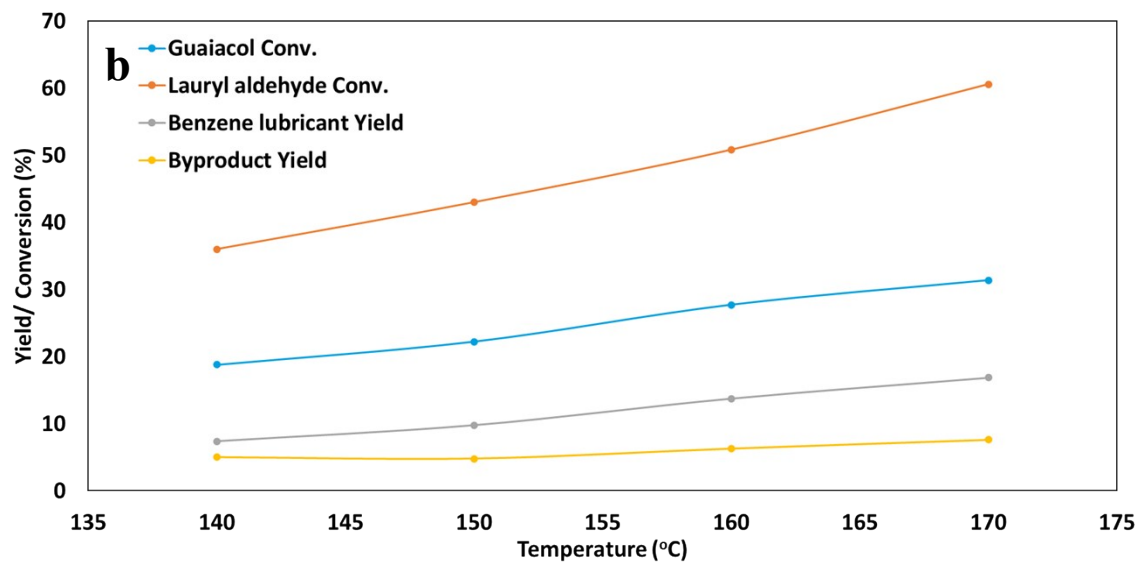

Figure S3: Effect of temperature on the yield of BBL and enal product and conversion of guaiacol and lauryl aldehyde reactants. A) Reaction conditions: 10 mmol guaiacol, 5 mmol lauryl aldehyde, 12 hr, 150 mg P-SiO<sub>2</sub>. B) Reaction conditions: 10 mmol guaiacol, 5 mmol lauryl aldehyde, 1 hr, 150 mg P-SiO<sub>2</sub>.

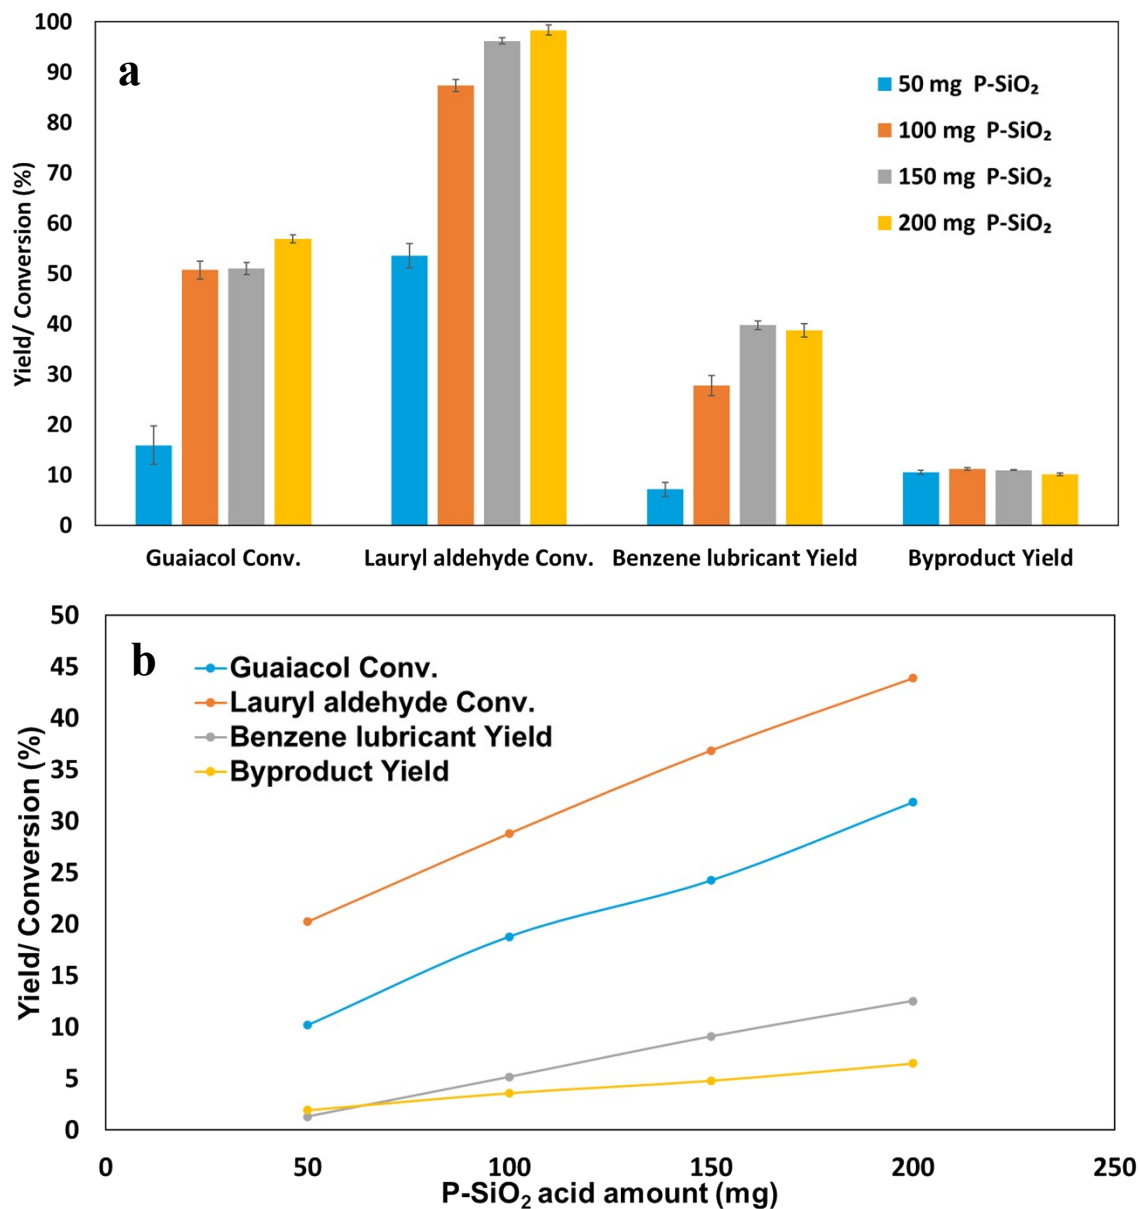

Figure S4: Effect of catalyst (P-SiO<sub>2</sub>) amount on the yield of BBL and enal product and conversion of guaiacol and lauryl aldehyde reactants. A) Reaction conditions: 10 mmol guaiacol, 5 mmol lauryl aldehyde, 12 hr, 150 °C. B) Reaction conditions: 10 mmol guaiacol, 5 mmol lauryl aldehyde, 1 hr, 150 °C.

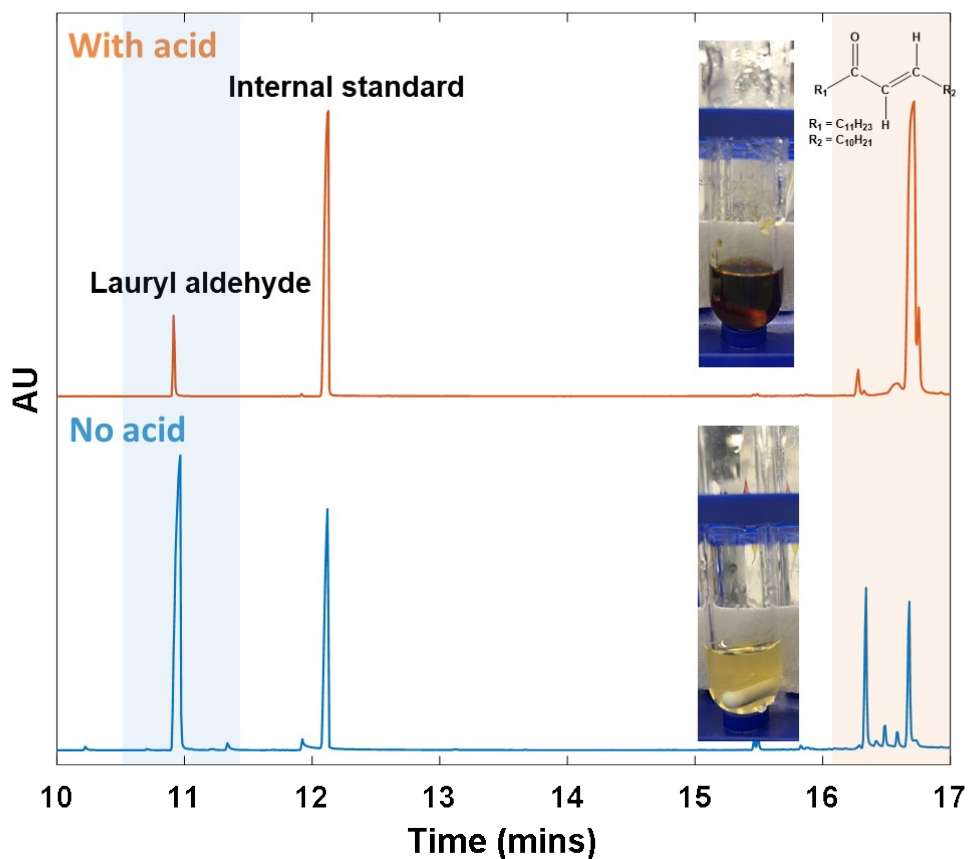

Figure S5: GC Chromatogram after heating lauryl aldehyde with and without acid catalyst. Reaction conditions: 5 mmol lauryl aldehyde, 100 mg P-SiO<sub>2</sub>, 150 °C, 15 hr. Pictures inset from lauryl aldehyde condensation with and without acid catalyst.

Table S1: Initial reaction rate data.

|                        | Reaction rates (M/min) |           |           |
|------------------------|------------------------|-----------|-----------|
|                        | 130 °C                 | 140 °C    | 150 °C    |
| $r_{\text{BBL}}$       | 0.0000381              | 0.0000453 | 0.0000784 |
| $r_{\text{Byproduct}}$ | 0.00000676             | 0.0000109 | 0.0000189 |

Reaction conditions: 10 mmol guaiacol, 5 mmol lauryl aldehyde, 100 mg P-SiO<sub>2</sub>.

Table S2: Comparison of guaiacol and lauryl aldehyde HAA in batch and semi-batch system.

|                                | Batch system | Semi-batch system |
|--------------------------------|--------------|-------------------|
| Guaiacol conversion (%)        | 51.0         | 59.6              |
| Lauryl aldehyde conversion (%) | 96.2         | 94.0              |

|                     |      |      |
|---------------------|------|------|
| BBL yield (%)       | 39.8 | 53.8 |
| Byproduct yield (%) | 11.0 | 6.8  |
| Carbon balance (%)  | 85.0 | 92.0 |

Reaction conditions. Batch system: 10 mmol guaiacol, 5 mmol lauryl aldehyde, 150 mg P-SiO<sub>2</sub>, 12 hr, 150 °C. Semi-batch system: 10 mmol guaiacol, 1.25 mmol lauryl aldehyde, 150 mg P-SiO<sub>2</sub>, 12 hr, 150 °C, 1.25 mmol lauryl aldehyde was added at an interval of 4 hr thrice.

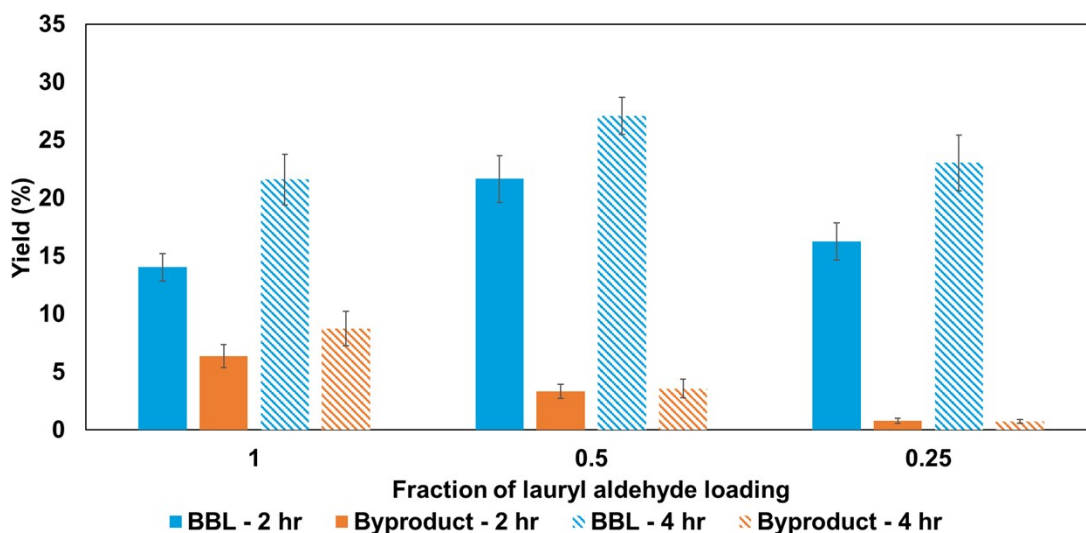

Figure S6: Yield of branched benzene lubricant (BBL) and condensation byproduct at various fractional loadings of lauryl aldehyde at 2 hr (solid bars) and 4 hr (slashed bars) reaction time. Reaction conditions: 10 mmol guaiacol, 5 mmol lauryl aldehyde (batch) 150 mg P-SiO<sub>2</sub>, 150 °C

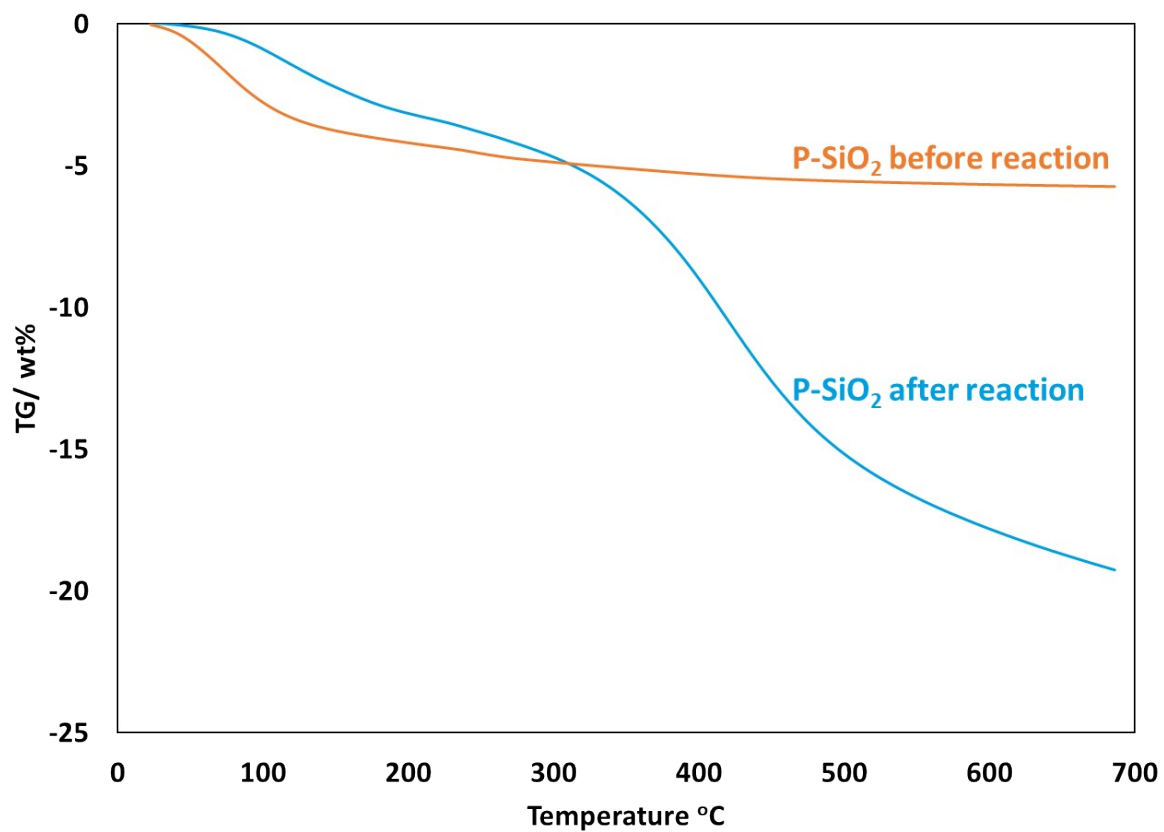

Figure S7: TGA profile of fresh and spent P-SiO<sub>2</sub> catalyst. Heating from 30 to 700 °C at a heating rate of 10 K min<sup>-1</sup> under air (30 mL min<sup>-1</sup>).



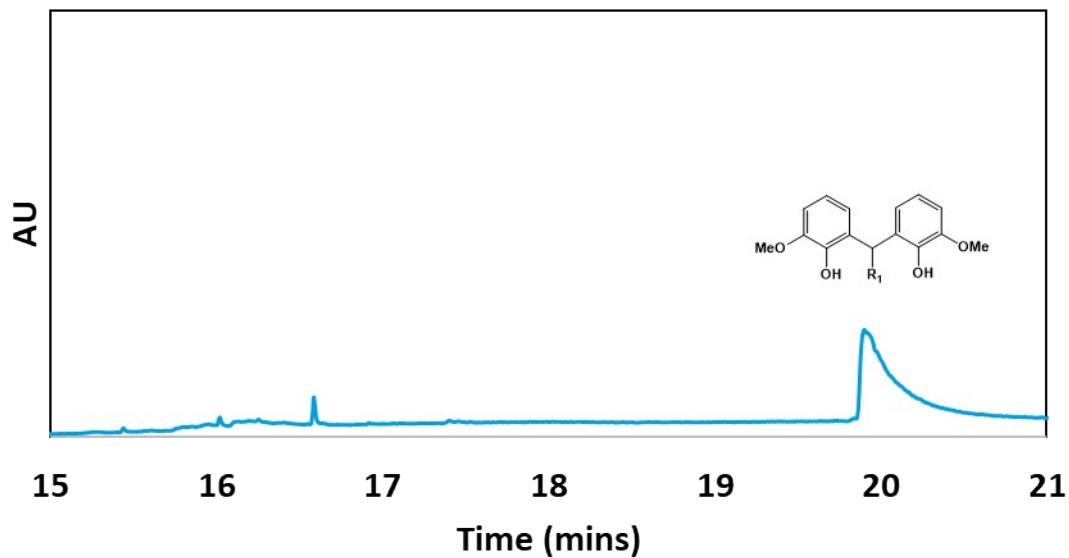

Figure S8: GC Chromatogram of THF wash of spent catalyst after HAA reaction.

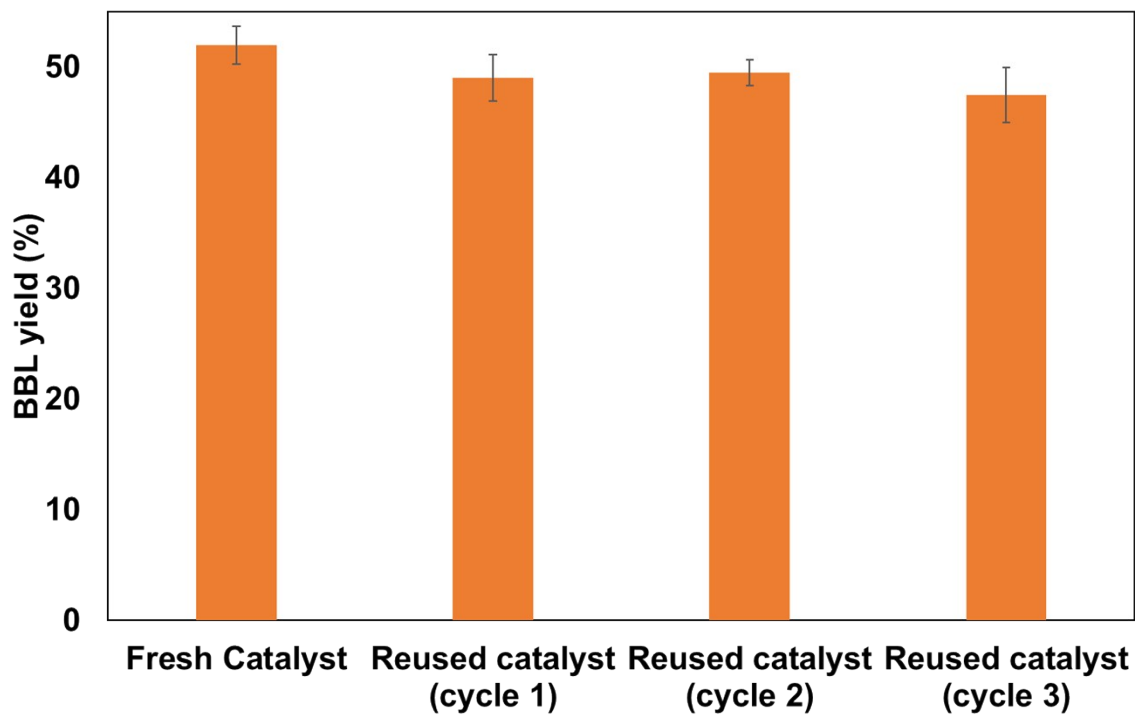

Figure S9: Recyclability of P-SiO<sub>2</sub> for the synthesis of branched benzene lubricant. Reaction conditions: 10 mmol guaiacol, 5 mmol lauryl aldehyde, 150 mg P-SiO<sub>2</sub>, 150 °C, 24 hr, semi-batch system.

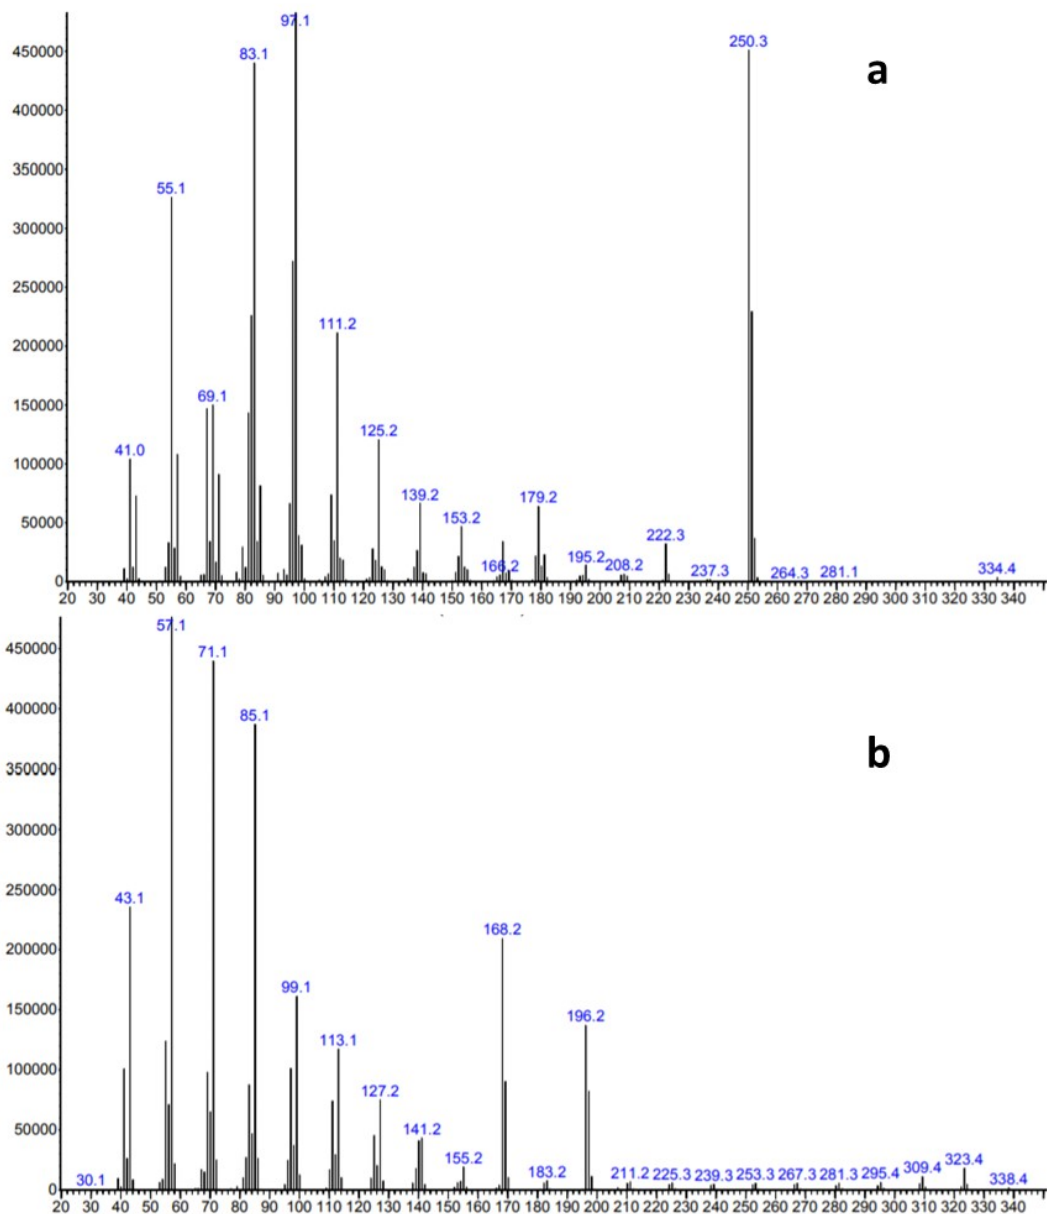

Figure S10: GCMS mass fragmentation of (a) cyclic  $C_{24}$  alkane base oil (mass from GCMS – 334.43, calculated mass – 334) and (b) branched  $C_{24}$  alkane base oil (mass from GCMS – 338.4, calculated mass – 338).

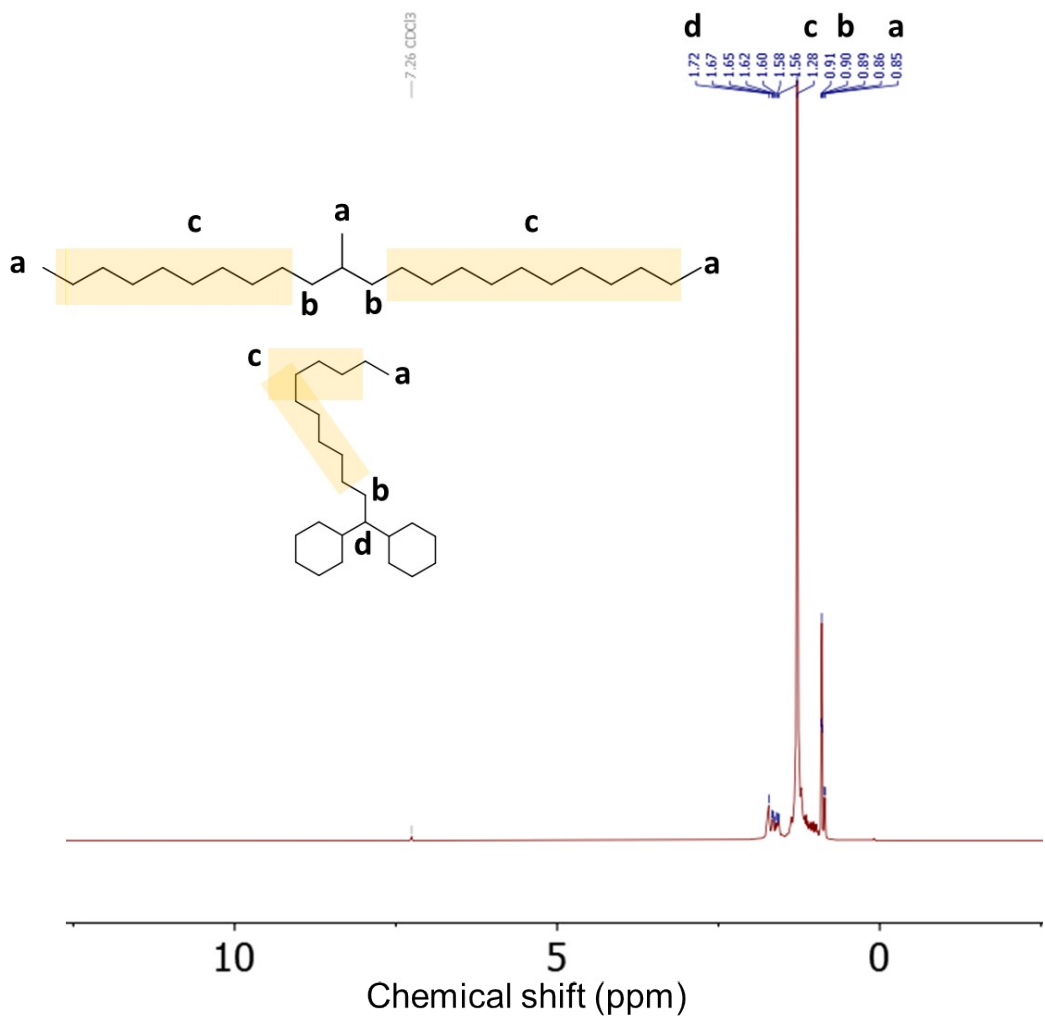

Figure S11:  $^1\text{H}$  NMR spectrum of  $\text{C}_{24}$  alkane lubricant mix. Sample was prepared in  $\text{CDCl}_3$ . The predominant product is the  $\text{C}_{24}$  cyclic alkane lubricant, followed by the  $\text{C}_{24}$  branched alkane lubricant. The labels a-d are referencing the hydrogen atoms.

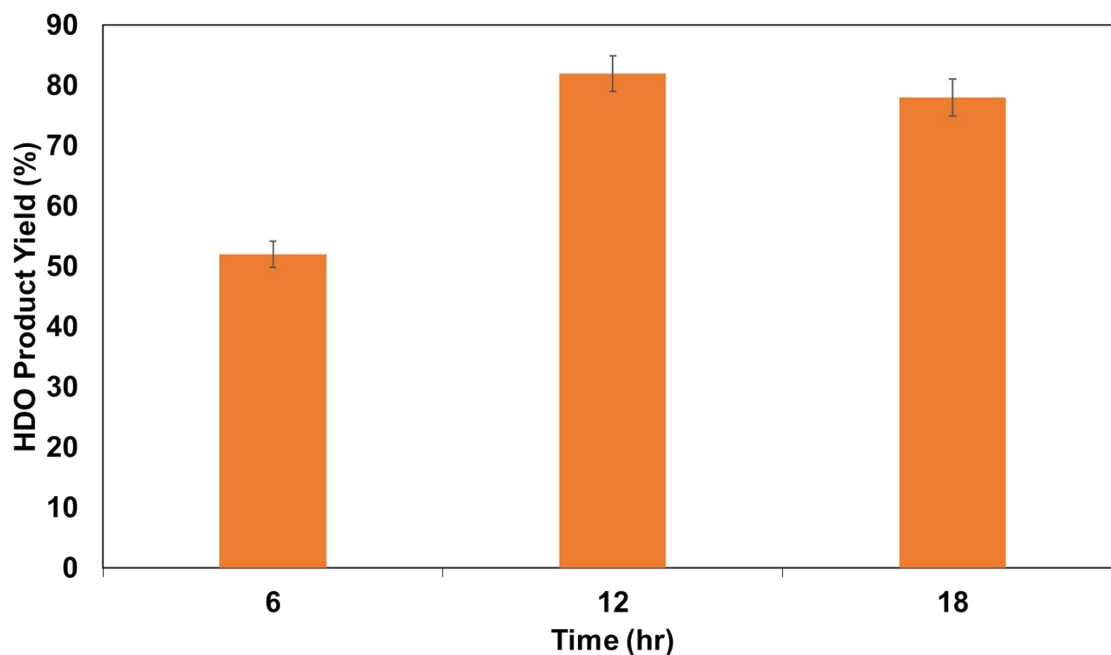

Figure S12: Branched cyclic lubricant yield at different reaction times (0.3 g HAA reaction product, 0.2 g Ir-ReOx on silica, 20 ml cyclohexane, 500 rpm, 200 °C, 5 MPa H<sub>2</sub>).

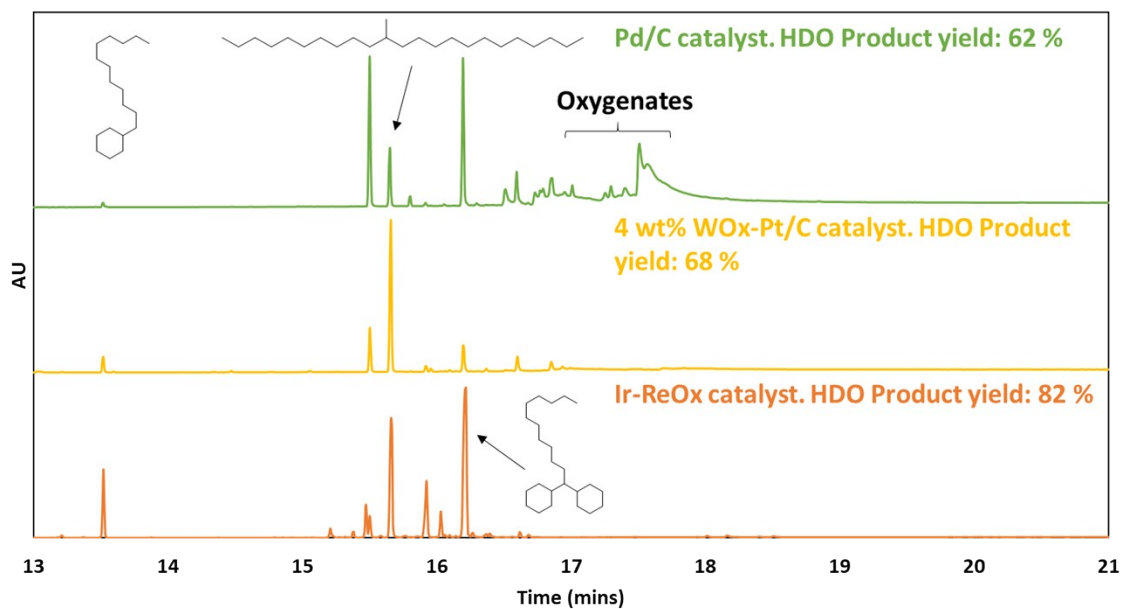

Figure S13: Chromatogram of HDO of benzene lubricant over different catalysts (0.3 g HAA reaction product, 0.2 g catalyst, 20 ml cyclohexane, 500 rpm, 200 °C, 12 hr, 5 MPa H<sub>2</sub>).

Table S3. Summary of experimental settings and lubricant product yields for the HDO reaction.  
 Reaction conditions: 0.3 g HAA reaction product, 0.2 g catalyst, 20 ml cyclohexane, 500 rpm, 5 MPa H<sub>2</sub>.

| Time (hr) | Temperature (°C) | Catalyst                     | C <sub>24</sub> lubricant mix yield* (%) |
|-----------|------------------|------------------------------|------------------------------------------|
| 6         | 200              | Ir-ReOx                      | 54                                       |
| 12        | 200              | Ir-ReOx                      | 82                                       |
| 18        | 200              | Ir-ReOx                      | 78                                       |
| 18        | 180              | Ir-ReOx                      | 52                                       |
| 18        | 220              | Ir-ReOx                      | 70                                       |
| 18        | 250              | Ir-ReOx                      | 67                                       |
| 12        | 200              | Pd/C                         | 62                                       |
| 12        | 200              | 4 wt.% WO <sub>x</sub> -Pt/C | 68                                       |

\*contains C<sub>24</sub> cyclic alkane lubricant, C<sub>24</sub> branched alkane lubricant and dodecyl cyclohexane

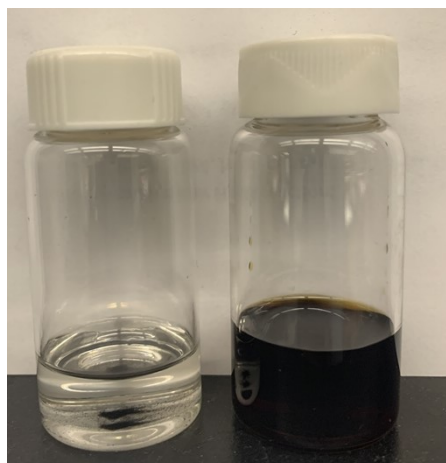

Figure S14: Lubricant products. Left (clear) –cyclic and branched C<sub>24</sub> alkane base oil from HDO reaction. Right (dark) – BBL and byproduct mixture from HAA reaction.
